# Supplementary material for: Methylomic Analysis of Nasal Brushings Reveals Two Subgroups in Pediatric Acute Respiratory Distress Syndrome
Source: Research Square preprint supplement (doi:10.21203/rs.3.rs-8042030/v1), 2026-01-22
Supplement: Supplementary file 1 [file 92262421870e95d3bbaebd2d.docx]

| **Subject** | **Duplicate** | **Methyl_Group** |
| --- | --- | --- |
| ARDS_001 | Yes | 2 |
| ARDS_002 | No | 1 |
| ARDS_003 | Yes | 1 |
| ARDS_004 | Yes | 1 |
| ARDS_010 | Yes | 2 |
| ARDS_015 | Yes | 2 |
| ARDS_016 | No | 2 |
| ARDS_018 | Yes | 1 |
| ARDS_019 | Yes | 1 |
| ARDS_021 | Yes | 1 |
| ARDS_023 | No | 2 |
| ARDS_026 | No | 1 |
| ARDS_029 | No | 1 |
| ARDS_030 | No | 2 |
| ARDS_031 | No | 2 |
| ARDS_032 | No | 1 |
| ARDS_034 | No | 1 |
| ARDS_036 | No | 2 |
| ARDS_037 | No | 2 |
| ARDS_039 | No | 2 |
| ARDS_045 | No | 2 |
| Control_001 | Yes | 2 |
| Control_022 | Yes | 2 |
| Control_023 | No | 2 |

Supplemental Table 1: Specimen log of each specimen with the subject ID designating the subject group and number. If a specimen was analyzed in our original work and residual DNA was re-analyzed in this work, it is designated as “Yes” in the duplicate column. There were 10 duplicate specimens and 14 new specimens. Methyl group assignment is noted in the third column.
