# Supplementary material for: Methylomic Analysis of Nasal Brushings Reveals Two Subgroups in Pediatric Acute Respiratory Distress Syndrome
Source: Research Square preprint supplement (doi:10.21203/rs.3.rs-8042030/v1), 2026-01-22
Supplement: Supplementary file 2 [file d82c5ea576ab250ff9d9de5b.docx]

**Enrollment Flow Chart**

Enrollment Period: April 2, 2018 - June 30, 2022

| **Subjects Screened**  n = 170 |
| --- |

↓

| **Total Enrolled**  n = 68 |
| --- |

↓

| **PARDS Group**  **25**  subjects enrolled | **Control Group**  **22**  subjects enrolled |
| --- | --- |

↓

| **Interim Analysis**  After enrollment of 47 subjects (25 PARDS + 22 Control) |
| --- |

↓

| **Continued Enrollment** |
| --- |

↓

| **Final PARDS Group**  **45**  total subjects  (+20 after interim) | **Final Control Group**  **23**  total subjects  (+1 after interim) |
| --- | --- |

Supplemental Figure 1: Enrollment flow chart showing the screening and enrollment numbers with enrollment stratified before and after our interim analysis.
